# Supplementary material
Source: PubMed Central journal article supplement (PMC138547)
Supplement: pnas_232432399_1.pdf [file pnas_232432399_1.pdf]

**Table 1. Data collection and MIR phasing statistics**

|                                    | Native        | PIP              | PTN              |
|------------------------------------|---------------|------------------|------------------|
| <b>Data collection</b>             |               |                  |                  |
| Resolution (Å)                     | 2.4(2.35,2.4) | 3.0(3.11-3.0)    | 3.0(3.11-3.0)    |
| Completeness* (%)                  | 99.4(100)     | 91.6(63.4)       | 95.7(80.2)       |
| Multiplicity                       | 18.6          | 6.5              | 5.6              |
| $\langle I/\sigma(I) \rangle$ *    | 39.0(3.7)     | 15.4(2.2)        | 10.5(1.0)        |
| $R_{\text{merge}}$ *               | 0.11(0.57)    | 0.05(0.38)       | 0.13(0.58)       |
| Wilson B (Å <sup>2</sup> )         | 58.3          | 67.7             | 79.2             |
| <b>MIR phasing</b>                 |               |                  |                  |
| Resolution (Å)                     |               | 50 – 4.0         | 50 – 4.0         |
| Sites per molecule                 |               | 3 <sup>†</sup>   | 4                |
| Total occupation                   |               | 0.77             | 0.95             |
| Phasing Power <sup>‡  </sup>       |               | 1.4(1.7)[1.1]    | 1.1(1.3)[1.1]    |
| $R_{\text{Cullis}}$ <sup>‡  </sup> |               | 0.71(0.76)[0.93] | 0.82(0.82)[0.92] |

\*Numbers in parentheses are values in the high resolution shell, where

$R_{\text{merge}} = \sum(I_i - \langle I \rangle) / \sum I_i$  summed over all independent reflections.

<sup>†</sup>Each site was split into pairs. <sup>‡</sup>The three numbers represent summation over: centric[acentric][acentric anomalous] reflections.

<sup>||</sup>Root mean square (rms)  $f_h/\text{residual} = \sqrt{(\sum(F_{\text{deri}} - F_{\text{PH}})^2)}$ , where  $f_h$  and  $F_{\text{PH}}$  are the calculated heavy-atom and derivative structure factors, respectively.

<sup>||</sup> $R_{\text{Cullis}} = \sum||f_h| - (|F_{\text{deri}}| - |F_{\text{nati}}|) / \sum||F_{\text{deri}}| - |F_{\text{nati}}||$ , where  $F_{\text{deri}}$  and  $F_{\text{nati}}$  are the observed derivative and native structure factors, respectively.
