# Supplementary material
Source: PubMed Central journal article supplement (PMC138547)
Supplement: pnas_232432399_4.pdf [file pnas_232432399_4.pdf]

**Table 2. Structural analysis of selected IL-6R mutational data**

|                         | <b>Loop</b>                                  | <b>IL-6<br/>Binding</b> | <b>Signaling</b> | <b>Comment</b>                                                                                         | <b>R</b> |
|-------------------------|----------------------------------------------|-------------------------|------------------|--------------------------------------------------------------------------------------------------------|----------|
| <b><u>Cluster 1</u></b> | <b><u>IL-6 / IL-6R binding interface</u></b> |                         |                  |                                                                                                        |          |
| P162                    | L3                                           | <10%                    | N.T.             | PE-LQ double mutant. Glu may interact with IL-6, Pro unlikely to                                       | Y        |
| E163                    | L3                                           |                         |                  |                                                                                                        |          |
| S228                    | L5                                           | 100%                    | <25%             | A range of mutants. Possible minor IL-6 cluster 1 residue                                              | K        |
| F229                    | L5                                           | <5%                     | 0%               | Major IL-6 binding site residue                                                                        | K        |
| Y230                    | L5                                           | <5%                     | 0%               | A range of mutants. IL-6 binding site residue                                                          | K        |
| R231                    | L5                                           | 0%                      | N.T.             | RL-SI double mutant. R231 is likely to be an IL-6 binding site residue.                                | Y        |
| L232                    | L5                                           |                         |                  | L232 is a buried hydrophobic residue                                                                   |          |
| E278                    | L7                                           | 0%                      | N.T.             | EF-AI double mutant. IL-6 binding site residues                                                        | Y        |
| F279                    | L7                                           |                         |                  |                                                                                                        |          |
| <b><u>Cluster 2</u></b> | <b><u>IL-6R dimer interface</u></b>          |                         |                  |                                                                                                        |          |
| F134                    | L2                                           | >100%                   | 70%              | F-L mutation, one of two Phe's in IL-6R dimer interface                                                | Y        |
| S167                    | L3                                           | 50-100%                 | 5-25%            | A range of mutants. Buried in loop & forms H bonds.                                                    | K        |
| F168                    | L3                                           | 100-130%                | 50%-110%         | A range of mutants. Central aromatic residue in IL-6R dimer interface. F-Y mutant signals at 50%       | K        |
| Y169                    |                                              | 30-70%                  | 0-15%            | A range of mutants – buried /structurally important residue                                            | K        |
| <b><u>Cluster 3</u></b> | <b><u>D3 signaling cluster</u></b>           |                         |                  |                                                                                                        |          |
| N211                    |                                              | 75%                     | N.T              | N-D mutant, <10 % (binding to gp130)                                                                   | S        |
| W214                    |                                              | 70%                     | >150%            | W-Q mutant – solvent exposed.                                                                          | Y        |
| V259                    |                                              | 40%                     | 140%             | Exposed V-N mutant.                                                                                    | Y        |
| I260                    |                                              | 0%                      | N.T.             | I-D mutation. Buried hydrophobic residue                                                               | Y        |
| H261                    |                                              | 115%                    | 10%              | H-I mutation.                                                                                          | Y        |
| D262                    |                                              | 30%                     | <10%             | D-G mutant. H-bonds to stabilise binding loop and maybe interacts with gp130 to form part of cluster 3 | Y        |

N.T = not tested; R = Reference

K=(30), Y=(17) &amp; S=(31)
