# Supplementary material
Source: PubMed Central journal article supplement (PMC138547)

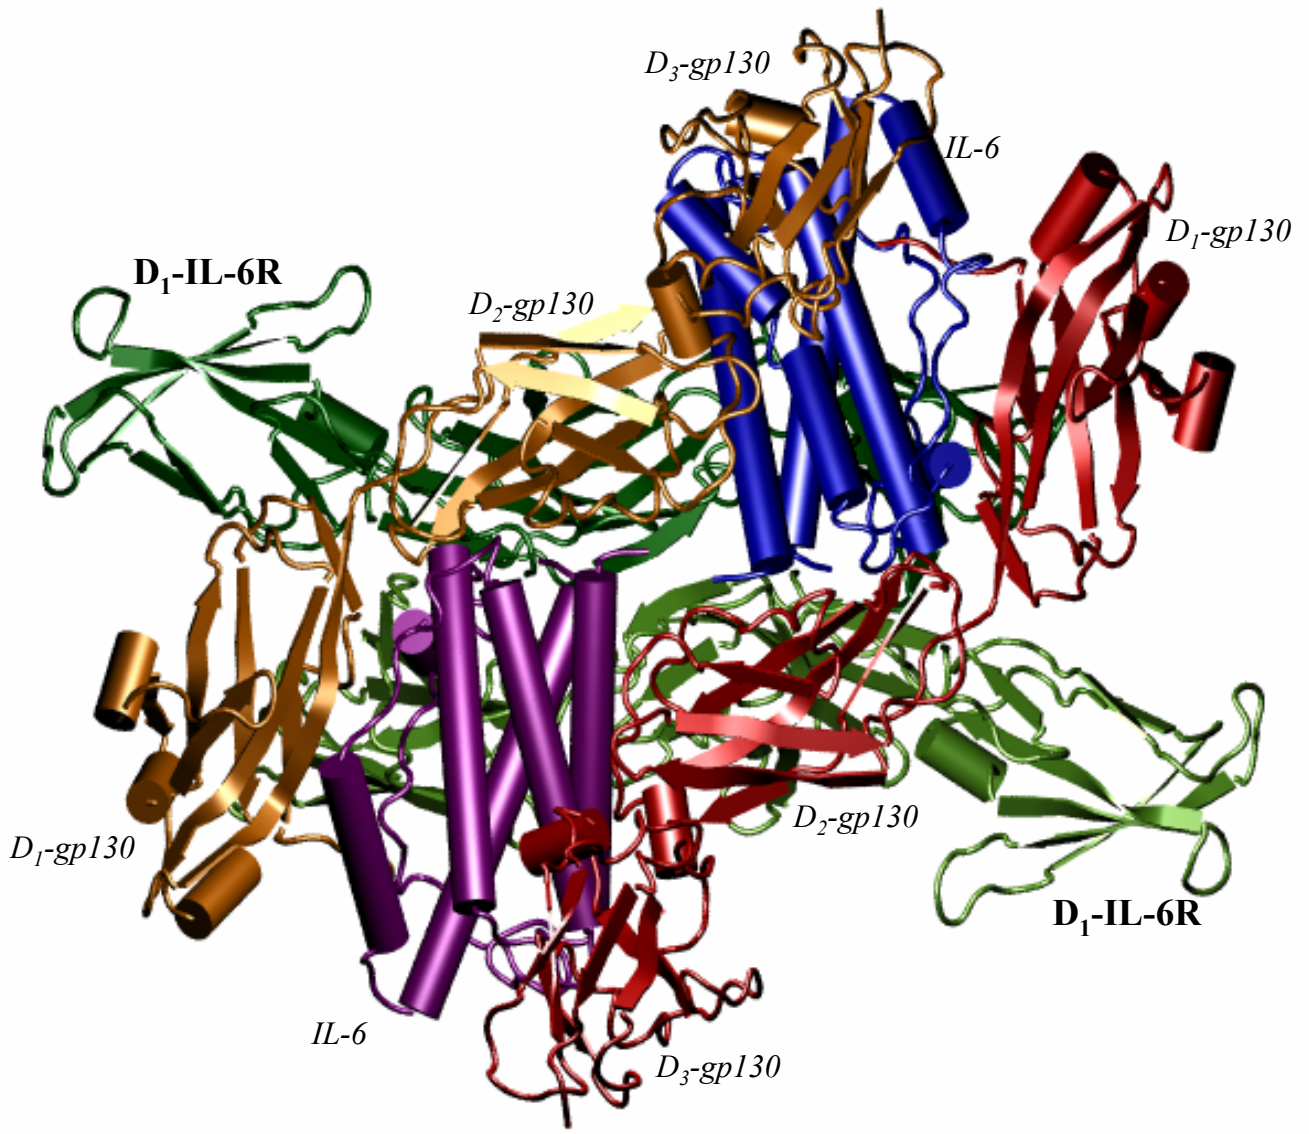

Supplement: pnas_232432399_3.pdf [file pnas_232432399_3.pdf]

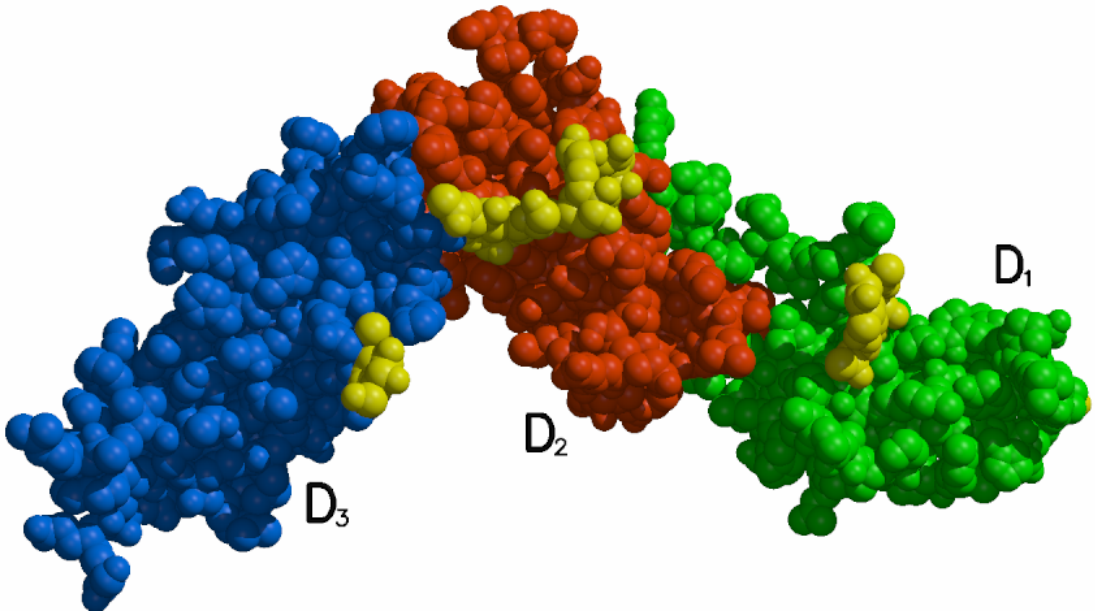

Supplement: pnas_232432399_6.pdf [file pnas_232432399_6.pdf]
